# Supplementary material for: Hierarchically porous biomorphic polymer derived C–SiOC ceramics
Source: Royal Society of Chemistry journal article supplement (doi:10.1039/c6ra21206a), 2016-01-01
Supplement: c6ra21206a1.pdf [file c6ra21206a1.pdf]

Electronic Supplementary Information

# Hierarchically Porous Biomimetic Polymer Derived C-SiOC Ceramics

Abhisek Choudhary, Swadesh K. Pratihari, Shantanu K. Behera

Laboratory of New Ceramics, Department of Ceramic Engineering

National Institute of Technology Rourkela Odisha 769008 India

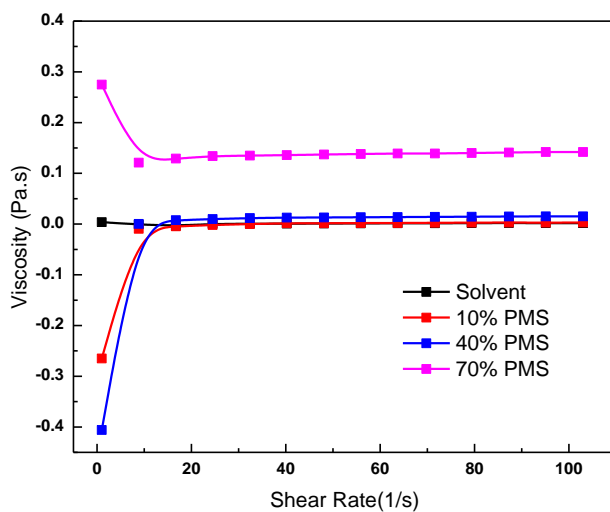

Figure S1: Viscosity of the polymer solution with the increase in shear rate

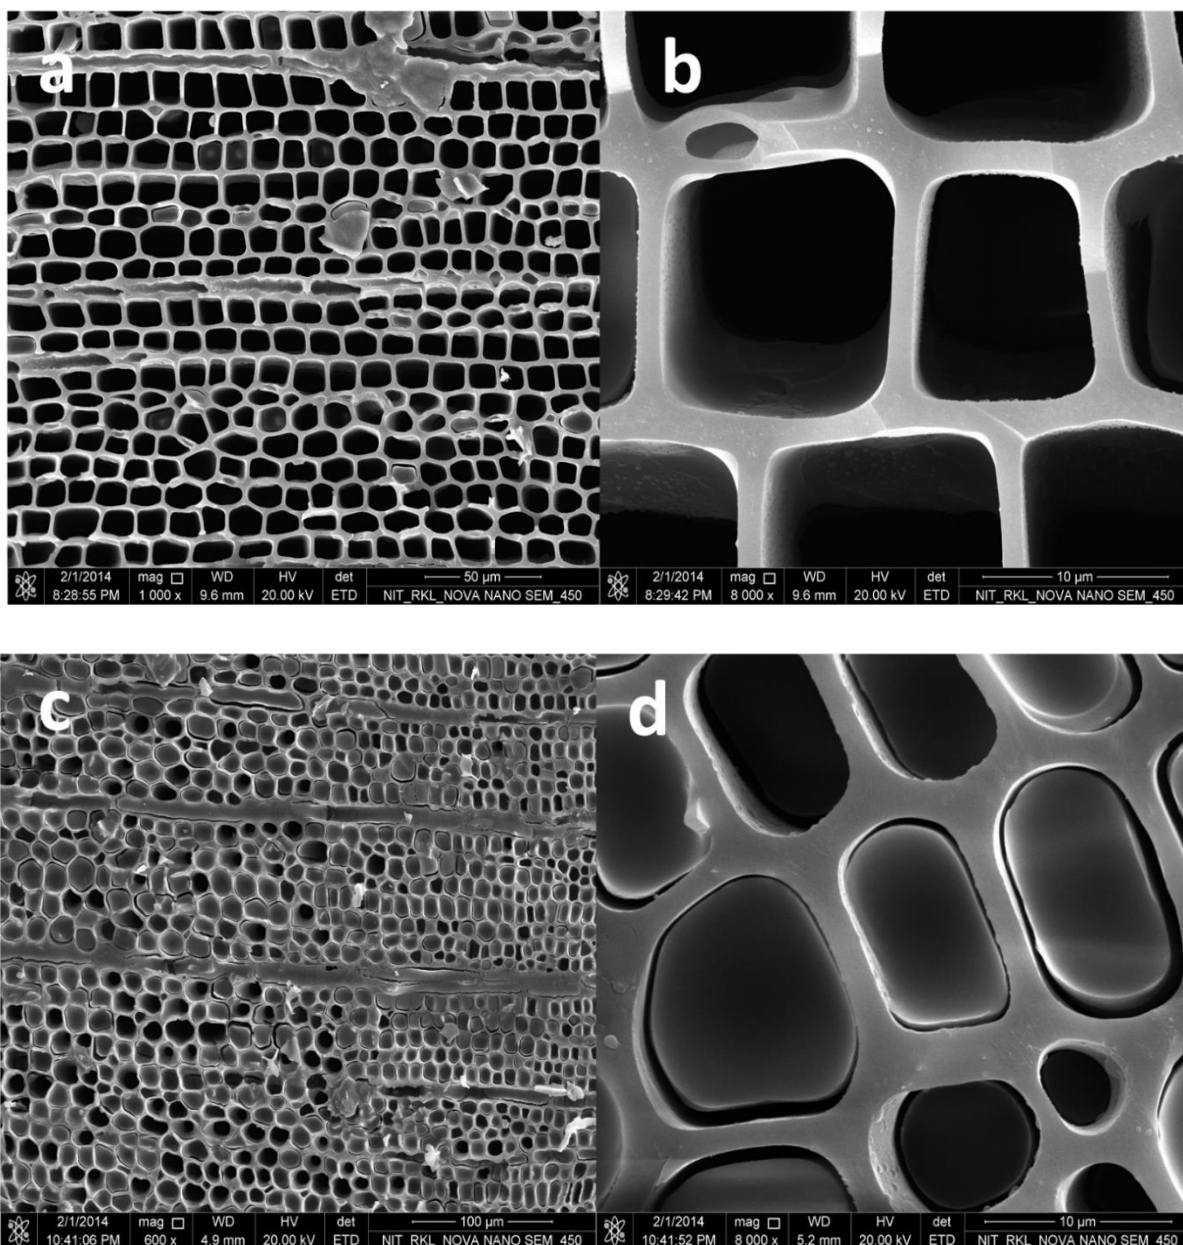

Figure S2: Microstructure of the SiCo ceramics pyrolyzed at 900 °C; (a, b) infiltrated once with the preceramic polymers, (c, d) samples with 5 infiltration cycles.

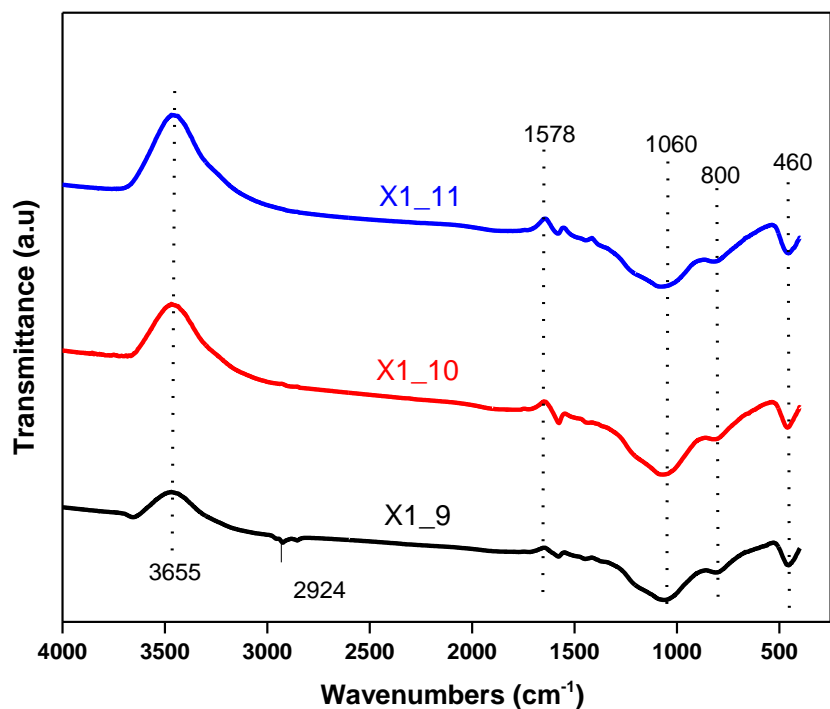

Figure S3: FTIR spectra for X1 pyrolysed at different pyrolysis temperature (900-1100 °C)

Figure S3 represents the FTIR spectra of X1 samples pyrolysed at 900, 1000, and 1100 °C. All of the spectra are characterized by the presence of hydroxyl group (-OH) in the wavenumber range 3650-3690  $\text{cm}^{-1}$ .<sup>1</sup> Small conjugated stretching bonds of -C=O are also observed in all spectra around 1576  $\text{cm}^{-1}$ . The absorption bands in the region of 1060  $\text{cm}^{-1}$  obtained in X1\_9, X1\_10, and X1\_11 are assigned to the transverse optical (TO) modes of the Si-O-Si asymmetric bond stretching vibrations.<sup>2</sup> The absorption bands at about 810  $\text{cm}^{-1}$  obtained in X1\_9, X1\_10, and X1\_11 samples are assigned to the symmetric bond stretching of Si-O-Si bonds. Similarly the absorption bands at about 460  $\text{cm}^{-1}$  in all of the samples are associated with the network Si-O-Si bending vibration. In addition, the absorption bands in the regions 1060 and 800  $\text{cm}^{-1}$  region are slightly broader, due to the occurrence of some mixed bonds involving C and O.<sup>3</sup> These features are consistent with the formation of silicon oxycarbide amorphous ceramics.

1. W. R. Busing, *The Journal of Chemical Physics*, 1955, **23**, 933-936.
2. M. Nogami, *J Non-Cryst Solids*, 1985, **69**, 415-423.

3. T. Oh, *B Korean Chem Soc*, 2009, **30**, 467-470.

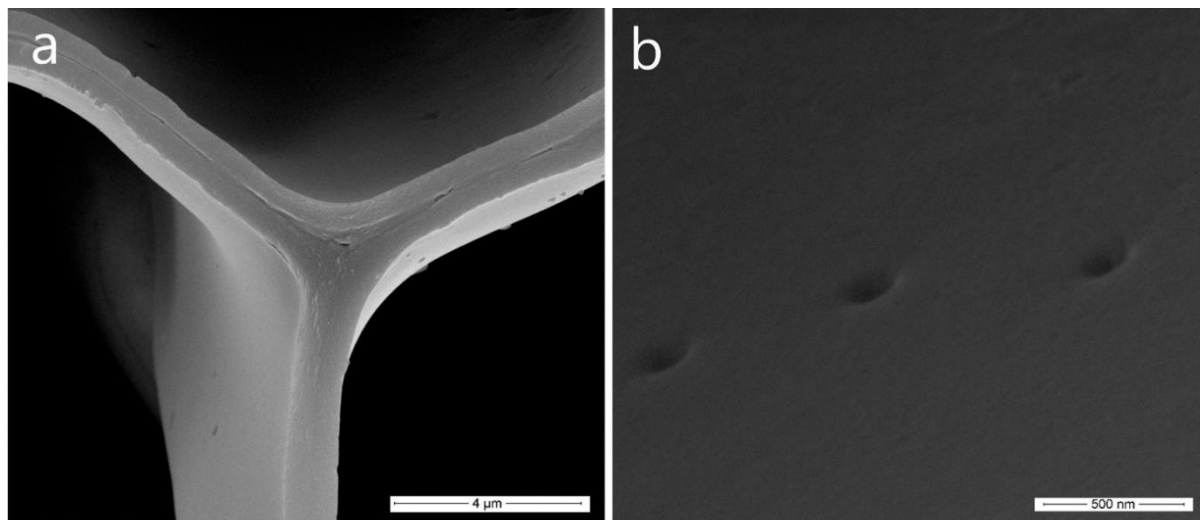

Figure S4: (a) Strut details of X1 sample pyrolyzed at 900 °C, (b) Strut interior
